# Supplementary material for: Irbesartan in Patients with Heart Failure and Preserved Ejection Fraction
Source: Atypon-hosted journal article supplement (doi:10.1056/nejmoa0805450), 2008-11-11
Supplement: nejm_massie_2456sa1.pdf [file nejm_massie_2456sa1.pdf]

## Supplementary Appendix

This appendix has been provided by the authors to give readers additional information about their work.

Supplement to: Massie BM, Carson PE, McMurray JJ, et al. Irbesartan in patients with heart failure and preserved ejection fraction. *N Engl J Med* 2008;359:2456-67. DOI: 10.1056/NEJMoa0805450.

## **APPENDIX: I-PRESERVE COMMITTEES AND INVESTIGATORS**

### **The I-PRESERVE Executive Committee:**

Peter E. Carson (USA), Barry M. Massie (USA) (Co-Chairs), Robert McKelvie (Canada), John McMurray (UK), Michel Komajda (France), Michael R. Zile (USA). Ex officio members: Agata Ptaszynska (BMS), Christoph Staiger (Sanofi Aventis).

### **The I-PRESERVE Steering Committee:**

Dennis V. Cokkinos (Greece), J.M. Cornel (The Netherlands), Ulf Dahlström (Sweden), Anthony Dalby (South Africa), Rafael Diaz (Argentina), Carlos Jerjes Sanchez Diaz (Mexico), Ranier Dietz (Berlin), Istve'n E' des (Hungary), Ferenc Follath (Switzerland), Ricardo Seabra Gomes (Portugal), J.R. Gonzalez-Juanatey (Spain), Jaromir Hradec (Czech Republic), Yves Juilliere (France), Lars Kober (Denmark), Dalane William Kitzman (USA), Henry Krum (Australia), V. Mareev (Russia), Theresa McDonagh (UK), Ken McDonald (Ireland), Evandro Tinoco Mesquita (Brazil), Christopher M. O'Connor (USA), Jan-Erik Otterstad (Norway), Piotr Ponikowski (Poland), Jean-Lucien Rouleau (Canada), L. Tavazzi (Italy), and Johan Vanhaecke (Belgium).

### **The Data Safety Monitoring Board:**

Sidney Goldstein (USA) (chair), Jay Cohn (USA), Desmond Julian (UK), Alain Leizorovicz (France), and James Neaton (USA).

### **The End-point Adjudication Committee:**

Chair: Michael Zile (USA): Michael White (Canada), William Gaasch (USA), Markus Haass (Germany), William Little (USA), Jose Lopez-Sendon (Spain), Inder Anand (USA), Alan Miller (USA), and John Teerlink (USA).

### **The I-PRESERVE Trial Investigators:**

#### ***Argentina (R. Diaz National Coordinator)***

PIs: A. Fernandez (Sanatorio Modelo de Quilmes), A. Ahuad Guerrero (Corporacion Medica General San Martin), A. Hershon (Fundacion Favalaro), E. Kuschnir (Instituto del Corazon Clinica Sucre), E. Marzetti (Hospital Luis Lagomaggiore), D. Nul (Clinica Constituyentes), E. Perna (Insttit de Card de Corrientes Jf Cabral), E. Paolasso (Instituto de Investigaciones Clinicas de Rosario).

#### ***Australia (H. Krum National Coordinator)***

PIs: J. Amerena (Geelong Hospital), D. Colquhoun (Wesley Medical Center), D. Cross (Royal Brisbane & Womens Hospital), I. Jeffery (The Canberra Hospital), H. Krum (Alfred Hospital), T. Marwick (Princess Alexandra Hospital), D. Rees (St. George Hospital), A. Sindone (Concord Repatriation General Hospital), B. Singh (Launceston General Hospital), J. Waites (Coffs Harbour Health Campus), W. Walsh (Prince of Wales Hospital).

#### ***Belgium (J. Vanhaecke National Coordinator)***

PIs: J. Boutefeu (Hospital Princesse Paola), G. Boxho (Ch La Tourelle), F. Coucke (Algemeen Ziekenhuis St. Erasmus), E. El Allaf (C.H. Hutois), R. Geukens (Paaz Virga Jesse Ziekenhuis), T. Gillebert (Universitair Ziekenhuis Gent), M. Goethals (O.L. Vrouwziekenhuis), W. Van Mieghem (Ziekenhuis Oost-Limburg Campus Andre Dumont), J. Vanhaecke (Universitair Ziekenhuis Leuven Gasthuisberg).

#### ***Brazil (E. Mesquita National Coordinator)***

PIs: D. Albuquerque (Hops Univ Pedro Ernesto - UERJ), A. DePaola (Univ Federal de Sao Paolo), G. Feitosa (Hospital Santa Isabel), J.F. Kerr Saraiva (Hosp Celso Piero Da Puccamp), E. Mesquita (Hospital Pro-Cardiaco), M. Moreira (Hospital Felicio Rocho), S. Rassi (Hosp Das Clinicas Da UFG), S. Salles Xavier (Hos Uni Clementino Fraga Filho).

#### ***Canada (J. Rouleau National Coordinator)***

PIs: C. Constance (Hopital Mazonneuve-Rosemont), E. Davies (Scarborough General Hospital), C. Fortin (Neufort, Inc.), P. Harvey (University Health Network), D. Isaac (Univeristy of Calgary), P. Klinke (Victoria Heart Institute Foundation), K. Kwok (Etobicoke Cardiology Assoc.), R. Leader (Baywood) Medical Center), P. Ma (Heart Health

Institute), R. McKelvie (Hamilton General Hospital), G. Moe (St. Michael's Hospital), A. Mukherjee (Digital Cardiology), J. Parker (Mount Sinai Hospital), G. Proulx (Hospital Laval), D. Savard (Medi Recherche), F. St-Maurice (Viacar Recherche Clinique), L. Yao (Humber River Regional Hospital).

***Czech Republic (J. Hradec National Coordinator)***

PIs: J. Drazka (Masarykova Nemocnice), P. Fridl (Institut Klinicke A Experimentalni Mediciny), J. Hradec (General University Hospital), H. Skalicka (Poliklinika Praha 9).

***Denmark (L. Kober National Coordinator)***

PIs: J. Bronnumschou (H:S Amager Hospital), C. Torp-Pedersen (Bispebjerg Hospital).

***France (Yves Juilliere National Coordinator)***

PIs: G. Amat (Centre Hospitalier De Vichy), F. Bauer (Centre Hospitalier Universitaire Hopital Charles), J. Bouvier (Centre Hospitalier De Cholet), B. Charbonnier (C.H. Regional et Universitaire Hopital Trousseau), J. Demarcq (Hopital Victor Provo), R. Fouche (Centre Hospitalier Andre Bouilloche), F. Funck (Centre Hospitalier Rene Dubos), M. Genest (Centre Hospitalier Leon Binet), Yves Juilliere (Hospital Brabois Adultes), J. Kahn (C.H. Intercommunal De Poissy - Saint Germain en Laye), R. Ketelers (Clinique Du Bois), M. Komajda (Groupe Hospitalier Pitie-Salpetriere), M. Martelet (Centre Hospitalier De Langres), T. Olive (Centre Hospitalier De Gap), J. Poulard (Centre Hospitalier D'Abbeville), M. Richard (Centre Hospitalier General Hopital Broussais), J.L. Roynard (Centre Hospitalier De Dax).

***Germany (R. Dietz National Coordinator)***

PIs: C. Angermann (Klinikum Der Universitaet Wuerzburg), M. Boehm (Universitaetst Kliniken Des Saarlandes), H. Figulla (Klinikum Der Friedrich-Schiller-Universitaet Jena), F. Freytag (Kreiskrankenhaus Gunzenhausen), L. Goedel-Meinen (Deutsches Herzzentrum), J. Hein (Praxis Dr. Jasper Hein), C. Hengstenberg (Klinikum Der Universitaet Regensburg), T. Horacek (Evangelisches Krankenhaus), J. Monti (Franz-Volhard-Klinik Berlin), T. Muenzel (Klinikum Der Johannes-Gutenberg-Universitaet), B. Pieske (Klinikum Der Georg-August Universitaet), H. Olbrich (Asklepios Kliniken Langen-Seligenstadt), M. Rachor (Staedtisches Krankenhaus Bad Homburg), H. Schultheiss (Universitaetst Klinikum Benjamin-Franklin), U. Sechtem (Robert-Bosch-Krankenhaus Stuttgart), H. Stahl (Stahl, Hans-Detlev), K. Stangl (Universitaetsklinikum Charite), H. Stempfle (Medizinische Klinik Innenstadt), R. Willenbrock (Krankenhaus St. Elisabeth Und St. Barbara), J. Wunderlich (Kardiologische Gemeinschaftspraxis).

***Greece (D. Cokkinos National Coordinator)***

PIs: D. Alexopoulos (University Hospital Of Patras), F. Kardaras (Evangelismos Hospital), D. Kremastinos (Onassis Cardiac Surgery Centre), I. Nanas (Alexandra University Hospital).

***Hungary (I. Edes National Coordinator)***

PIs: T. Buza (Budagyongye Hospital), I. Edes (Debrecen University), T. Forster (Szeged University), K. Simon (Siofok Varosi Korhaz).

***Ireland (K. McDonald National Coordinator)***

PI: V. Maher (Adelaide and Meath Hospital), K. McDonald (St. Vincent's Hospital).

***Italy (L. Tavazzi National Coordinator)***

PIs: E. Bernobich (Ospedale Cattinara - Univ. Trieste), D. Cucinotta (Azienda Ospedaliera Policlinico S.Orsola M.Malpighi), E. Feraco (I.N.R.C.A. Divisione Cardiologia), P. Fioretti (Ospedale Santa Maria Della Misericordia), L. Moretti (Ospedale Mazzoni), R. Nami (Policlinico Le Scotte-Ist.Clin. Med.Iii-U.O. Ipertensione), C. Prati (Azienda Unita' Sanitaria Locale Piacenza), R. Rozzini (U.O. Geriatria - Osp.- Nuova Poliambulanza), U. Senin (Policlinico S.Maria Della Misericordia - U.O. Geriatria), L. Tavazzi (Ircss Policlinico S. Matteo -Divisione Di Cardiologia), M. Volpe (Az.Osp.S' Andrea / Dip.To Med.Sperimentale).

***Mexico (C. Diaz National Coordinator)***

PIs: C. Calvo (Hospital Civil Juan I. Menchaca), A. Cruz (Hospital Norte De Pemex), E. Gomez (Centro Medico Nacional 20 De Noviembre Issste), I. Hernandez (Hospital Juarez De Mexico), E. Meaney (Hospital Regional Iero De Octubre Issste), A. Orea (Instituto Nacional De Ciencias Medicas Y Nutricion

S.Z.), M. Rosas (Instituto Nacional De Cardiologia), C. Sanchez (Hospital De Enf. Cardiovasculares Y Del Torax #34 Imss), E. Villegas (Central Medico Quirurgica De Aguascalientes).

***The Netherlands (J. Cornel National Coordinator)***

PIs: P. Bronzwaer (De Heel Zaans Medisch Centrum), J. Cornel (Medisch Centrum Alkmaar), L. Cozijnsen (Gelre Ziekenhuizen, Locatie Juliana), M. De Leeuw (Wilhelmina Ziekenhuis), A. Derks (Streekziekenhuis Midden-Twente), D. DeWaard (Antonius Ziekenhuis), P. Dunselman (Amphia Ziekenhuis, Lokatie Molengracht), M. Freericks (Ikazia Ziekenhuis), B. Hamer (Meander Medisch Centrum, Lokatie Lichtenberg), D. Hertzberger (Canisius Wilhelmina Ziekenhuis), M. Nagelsmit (Scheper Ziekenhuis), P. Nierop (Sint Franciscus Gasthuis), J. Posma (Martini Martini Ziekenhuis Lokatie Van Swieten). L. Slegers (Sint Joseph Ziekenhuis), F. Van Asperdt (Elkerliek Ziekenhuis, Lokatie Helmond), M. Van Daele (aaslandziekenhuis), M. Van Der Linden (Vlietland Ziekenhuis Vlaardingen), P. Van Rossum (Rivas Medizorg), D. Van Veldhuisen (UMCG, Universitair Medisch Centrum Groningen), J. Verheul (Flevoziekenhuis), J. Wesdorp (Sparne Ziekenhuis), A. Withagen (Reinier De Graaf Groep Delft).

***Norway J. Otterstad (National Coordinator)***

PIs: E. Aaser (Baerum Hospital), J. Otterstad (Vestfold Central Hospital), C. Von Brandis (Sentralsjukehuset I Rogaland).

***Poland (P. Ponikowski National Coordinator)***

PIs: M. Dluzniewski (Wojewodzki Szpital Brodnowski), Z. Gaciong (Klinika Nadcisnienia Tetniczego Akademii Medycznej), Z. Kubica (Akademia Medyczna Im. L. Rydygiera), M. Ogorek (Samodzielny Szpital Wojewodzki), P. Ponikowski (Szpital Wojskowy), W. Ruzyllo (Instytut Kardiologii), M. Tendera (Slaska Akademia Medyczna), M. Ujda (Powiatowy Szpital Specjalistyczny), B. Zalska (Zoz Mswia).

***Portugal (R. Gomes National Coordinator)***

PIs: D. Brito (Hospital De Santa Maria), M. Cortez (Hospital Pedro Hispano), C. Fonseca (Hospital Sao Francisco Xavier).

***Russia (V. Mareev National Coordinator)***

PIs: O. Alexandrov (Russian State Medical University), V. Ardashev (Central Military Clinical Hospital Burdenko), B. Bart (Russian State Medical University), S.I. Bogoslovskaya (Saratov Scientific Research Institute of Cardiology), I. Bokarev (Municipal Clinical Hospital # 20), S. Fitilev (City Cardiology Prophylactic Center), I. Fomina (Municipal Clinical Hospital # 61), M. Glezer (Municipal Clinical Hospital # 59), B. Goloschekin (St. Petersburg City Hospital # 15), E. Grineva (St. Petersburg State Medical University), A. Ivleva (Outpatient Clinic #1), V. Kostenko (St. Petersburg Emergency Research Institute), V. Mareev (Moscow Cardiology Research Center), V. Milyagin (Smolensk State Medical Academy of Ministry of Public Health), S. Minkin (Consultative And Diagnostic Center # 1), N. Nosova (St. Petersburg Outpatient Clinic # 34), L.I. Olbinskaya (Moscow Medical Academy), V. Orlov (Medical Academy of Postgraduate Ed.), N. Perepetch (Mechnikov Medical Academy), M. Repin (St. Petersburg City Outpatient Clinic # 40), M. Ruda (Moscow Cardiology Research Center), A. Sherenkov (Krasnogvardeysky District Medical-Physiology), E. Shlyakhto (St. Petersburg Cardiology Research Institute), B. Sidorenko (Governmental Central Clinical Hospital), A. Sinopalnikov (Institute of Postgraduate Medical Education Of Dm), A. Starodubtsev (Municipal Clinical Hospital # 23 Named After Medsantrud), G. Storozhakov (Russian State Medical University), Y. Vasyuk (Moscow Medical Stomatological Institute), A. Vishnevsky (St. Petersburg City Pokrovskaya Hospital), G. Zalevsky (St. Petersburg Municipal Clinical Hospital # 28), D. Zateystchikov (Municipal Clinical Hospital # 51).

***South Africa (A. Dalby National Coordinator)***

PIs: A. Dalby (Milpark Hospital), C. Libhaber (Chris Hani Baragwanath Hospital), D. Naidoo (Nelson R. Mandela School Of Med), J. Patel (St. Augustine's Medical Centre 2), L. Steingo (Morningside Clinic).

***Spain (J. Gonzalez-Juanatey National Coordinator)***

PIs: M. Anguita Sanchez (Hospital Universitario Reina Sofia), C. Calvo Gomez (Hospital Clinico Univ. De Santiago DeC.), J. Casademont (Hospital Clinic), P. Conthe (Hospital Gral. Univ. Gregorio Maranon), E. De Teresa Galvan (Hospital Univ. Virgen De La Victoria), J. M. Fernandez (Hospital Universitario Virgen Macarena), I. Ferreira (Hospital Clinico Univ. Lozano Blesa), J. Forteza (Hospital Son Dureta), J. Garcia Puig (Hospital

Universitario La Paz), J. Gonzalez-Juanatey (Hospital Clinico Univ. De Santiago De C.), L. Pastor (Hospital Universitario De Valme), F. Ridocci-Soriano (Hospital General Univ. De Valencia), F. Soria (Hospital Univ. Virgen De La Arrixaca), C. Suarez (Hospital Universitario De La Princesa), J. Zamorano (Hospital Clinico San Carlos).

***Sweden (U. Dahlstrom National Coordinator):***

PIs: G. Ahlmark (Falun Hospital), K. Boman (Skelleftea County Hospital), U. Dahlstrom (Linkoping University Hospital), C. Hglund (City Heart Stockholm Kb), T. Kahan (Danderyd Hospital), M. Lycksell (Sundsvall County Hospital), M. Saufelberger (Sahlgrenska University Hospital/Ostra), R. Willenheimer (University Hospital Mas).

***Switzerland (F. Follath National Coordinator)***

PI: A. Gallino (Gallino Augusto), W. Estlinbaum (Kantonsspital).

***U.K. T. McDonagh (National Coordinator)***

PIs: J. Cleland (Hull Royal Infirmary), J. McMurray (Western Infirmary), J. Purvis (Altnagelvin Area Hospital), M. Pye (York District Hospital), J. Stephens (Oldchurch Hospital).

***USA (D. Kitzman, C. O'Connor National Coordinators)***

**Alabama:** A. Bouchard (Cardiology P.C.). **Arizona:** M. Goldberg (Saguaro Clinical Research), S. Goldman (Southern Arizona VA Health Care System), B. Peart (Southwest Heart), G. Wong (Cardiac Solutions). **Arkansas:** Y. Aude (Cent. Arkansas Vet Health Sys.). **California:** R. Davidson (Capri), B. Greenberg (UCSD Medical Center), B. Massie (San Francisco Veterans Affairs Medical Center). **Connecticut:** W. D. Hagar (UConn Health Center). **Florida:** K. Adams (Jacksonville Heart Center), L. Hendley (Benchmark Clin Mangt Group), T. Hilton (Jacksonville Heart Center), M. Lakow (Florida CV Research, L.C.), R. Schneider (The Broward Heart Group, PA), D. Schocken (University of South Florida-College of Medicine). **Illinois:** B. Clemson (Heartcare Midwest). **Indiana:** J. Ortiz (Research Institute of Middle America). **Kentucky:** M. Bessen (MCC Research Foundation). **Louisiana:** J. Ghali (Louisiana State University Health Sciences Center-Shreveport), B. Iteld (Louisiana Heart Center). **Maine:** R. Weiss (Androscoggin Cardio. Assoc.). **Maryland:** R. DiBianco (Cardiovascular Consultants), S. Mason (Midatlantic Cardiovascular Associates), J. Porterfield (Midatlantic Cardiovascular Associates, PA). **Massachusetts:** S. Bilazerian (Pentucket Medical Associates), M. Semigran (Massachusetts General Hospital), V. Desai (Charles River Medical Associates). **Michigan:** H. Colfer (Northern Michigan Hospital), M. Guglin (John D Dingell VAMC). **Minnesota:** I. Anand (Univ. of Minnesota Medical School). **Missouri:** M. Rich (Washington University School of Medicine). **Nebraska:** D. Chapman (Heart Consultants, PC), A. Reyes (Creighton Cardiac Center). **Nevada:** W. Graettinger (Reno VAMC). **New Jersey:** M. Gelernt (Cardiovascular Associates of the Delaware Valley). **New Hampshire:** B. Hettleman (Dartmouth-Hitchcock Medical Center). **New Mexico:** R. Orchard (New Mexico Heart Institute). **New York:** L. Baruch (VA Medical Center), R. Benton (Capital Cardiology Associates, PC), C. Liang (University of Rochester Medical Center), R. Silverman (Silverman Heart Care Center). **North Carolina:** P. Campbell (North East Medical Center), D. Kitzman (Wake Forest University), C. O'Connor (Duke University Medical Center), C. Sueta (University of North Carolina at Chapel Hill). **Ohio:** P. Amsterdam (Cardiovascular Research Institute, Inc.), E. Chung (Lindner Clinical Trial Center), D. Grech (North Ohio Research Ltd.), M. Traboulssi (North Ohio Research, Ltd.), D. Utlak (United Health Network, Ltd.). **Oregon:** S. Lewis (Northwest Cardiovascular Institute). **Pennsylvania:** R. Rodriquez (Chestnut Hill Cardiology Ltd.), R. Small (Lancaster Heart Foundation). **South Carolina:** T. O'Brien (Medical University of South Carolina), M. Zile (Medical University of South Carolina). **Tennessee:** F. McGrew (Stern Cardiovascular Center, PA). **Texas:** S. Blois (Austin Heart, PA Research Account). **Virginia:** R. Goulah (DUCCS of South Boston), T. Nygaard (Cardiovascular Associates of Central VA, Inc.), M. Peberdy (Virginia Commonwealth University). **Washington:** D. Stagaman (Rockwood Clinic Cardiology and Heart Institute).
